# Supplementary material for: A bibliometric analysis of the cannabis and cannabinoid research literature
Source: Springer Nature journal article supplement (doi:10.1186/s42238-022-00133-0), 2022-05-25
Supplement: MOESM1 [file 42238_2022_133_MOESM1_ESM.pdf]

## Supplementary File 1: Decade-by-Decade Cannabis and Cannabinoid Research Bibliographic Data (1960s-2010s)

### Decade-by-Decade Breakdown by Open Access Status (1960s-2010s)

| Decade              | Open Access | % of Total | Subscription | % of Total |
|---------------------|-------------|------------|--------------|------------|
| 1960-1969 (n=301)   | 28          | 9.30       | 273          | 90.70      |
| 1970-1979 (n=2349)  | 86          | 3.66       | 2263         | 96.34      |
| 1980-1989 (n=1555)  | 49          | 3.15       | 1506         | 96.85      |
| 1990-1999 (n=2071)  | 252         | 12.17      | 1819         | 87.83      |
| 2000-2009 (n=5995)  | 1602        | 26.72      | 4393         | 73.28      |
| 2010-2019 (n=13788) | 6745        | 48.92      | 7043         | 51.08      |

**Decade-by-Decade Breakdown by Subject Area (1960s-2010s)**

| Subject Area                                 | Decade            |            |                   |            |                   |            |                   |            |                   |            |                   |            |
|----------------------------------------------|-------------------|------------|-------------------|------------|-------------------|------------|-------------------|------------|-------------------|------------|-------------------|------------|
|                                              | 1960-1969         |            | 1970-1979         |            | 1980-1989         |            | 1990-1999         |            | 2000-2009         |            | 2010-2019         |            |
|                                              | # of Publications | % of Total | # of Publications | % of Total | # of Publications | % of Total | # of Publications | % of Total | # of Publications | % of Total | # of Publications | % of Total |
| Agricultural and Biological Sciences         | 25                | 8.31       | 79                | 3.36       | 54                | 3.47       | 115               | 5.55       | 273               | 4.55       | 668               | 4.84       |
| Arts and Humanities                          | 5                 | 1.66       | 116               | 4.94       | 15                | 0.96       | 25                | 1.21       | 73                | 1.22       | 137               | 0.99       |
| Biochemistry, Genetics and Molecular Biology | 58                | 19.27      | 473               | 20.14      | 341               | 21.93      | 638               | 30.81      | 1385              | 23.10      | 2243              | 16.27      |
| Business, Management and Accounting          | 0                 | 0.00       | 5                 | 0.21       | 4                 | 0.26       | 2                 | 0.10       | 7                 | 0.12       | 83                | 0.60       |
| Chemical Engineering                         | 15                | 4.98       | 23                | 0.98       | 40                | 2.57       | 54                | 2.61       | 74                | 1.23       | 257               | 1.86       |
| Chemistry                                    | 54                | 17.94      | 152               | 6.47       | 157               | 10.10      | 139               | 6.71       | 311               | 5.19       | 968               | 7.02       |
| Computer Science                             | 0                 | 0.00       | 4                 | 0.17       | 0                 | 0.00       | 4                 | 0.19       | 6                 | 0.10       | 65                | 0.47       |
| Decision Sciences                            | 0                 | 0.00       | 0                 | 0.00       | 0                 | 0.00       | 1                 | 0.05       | 5                 | 0.08       | 8                 | 0.06       |
| Dentistry                                    | 0                 | 0.00       | 0                 | 0.00       | 1                 | 0.06       | 4                 | 0.19       | 6                 | 0.10       | 31                | 0.22       |
| Earth and Planetary Sciences                 | 2                 | 0.66       | 12                | 0.51       | 2                 | 0.13       | 7                 | 0.34       | 3                 | 0.05       | 21                | 0.15       |
| Economics, Econometrics and Finance          | 0                 | 0.00       | 3                 | 0.13       | 1                 | 0.06       | 3                 | 0.14       | 21                | 0.35       | 90                | 0.65       |
| Energy                                       | 0                 | 0.00       | 0                 | 0.00       | 0                 | 0.00       | 3                 | 0.14       | 7                 | 0.12       | 40                | 0.29       |
| Engineering                                  | 0                 | 0.00       | 7                 | 0.30       | 4                 | 0.26       | 9                 | 0.43       | 30                | 0.50       | 142               | 1.03       |
| Environmental Science                        | 3                 | 1.00       | 29                | 1.23       | 68                | 4.37       | 64                | 3.09       | 87                | 1.45       | 456               | 3.31       |
| Health Professions                           | 0                 | 0.00       | 5                 | 0.21       | 10                | 0.64       | 6                 | 0.29       | 22                | 0.37       | 105               | 0.76       |
| Immunology and Microbiology                  | 4                 | 1.33       | 12                | 0.51       | 16                | 1.03       | 32                | 1.55       | 113               | 1.88       | 289               | 2.10       |
| Materials Science                            | 7                 | 2.33       | 0                 | 0.00       | 4                 | 0.26       | 11                | 0.53       | 27                | 0.45       | 108               | 0.78       |
| Mathematics                                  | 0                 | 0.00       | 1                 | 0.04       | 3                 | 0.19       | 2                 | 0.10       | 4                 | 0.07       | 27                | 0.20       |
| Medicine                                     | 159               | 52.82      | 1335              | 56.83      | 877               | 56.40      | 894               | 43.17      | 3122              | 52.08      | 8460              | 61.36      |
| Multidisciplinary                            | 15                | 4.98       | 58                | 2.47       | 6                 | 0.39       | 34                | 1.64       | 49                | 0.82       | 321               | 2.33       |
| Neuroscience                                 | 4                 | 1.33       | 147               | 6.26       | 102               | 6.56       | 351               | 16.95      | 1176              | 19.62      | 2023              | 14.67      |
| Nursing                                      | 1                 | 0.33       | 14                | 0.60       | 18                | 1.16       | 18                | 0.87       | 108               | 1.80       | 362               | 2.63       |
| Pharmacology, Toxicology and Pharmaceutics   | 63                | 20.93      | 641               | 27.29      | 502               | 32.28      | 718               | 34.67      | 1971              | 32.88      | 3902              | 28.30      |

|                       |    |      |     |      |     |      |     |      |     |      |      |      |
|-----------------------|----|------|-----|------|-----|------|-----|------|-----|------|------|------|
| Physics and Astronomy | 0  | 0.00 | 6   | 0.26 | 2   | 0.13 | 5   | 0.24 | 11  | 0.18 | 61   | 0.44 |
| Psychology            | 18 | 5.98 | 131 | 5.58 | 142 | 9.13 | 124 | 5.99 | 468 | 7.81 | 1340 | 9.72 |
| Social Sciences       | 11 | 3.65 | 140 | 5.96 | 147 | 9.45 | 133 | 6.42 | 331 | 5.52 | 1126 | 8.17 |
| Veterinary            | 0  | 0.00 | 10  | 0.43 | 8   | 0.51 | 3   | 0.14 | 12  | 0.20 | 39   | 0.28 |
| Undefined             | 0  | 0.00 | 1   | 0.04 | 3   | 0.19 | 3   | 0.14 | 0   | 0.00 | 1    | 0.01 |

**Decade-by-Decade Breakdown by Top 10 Source Titles (1960s-2010s)**

| 1960-1969                                                              |                   |            | 1970-1979                                           |                   |            | 1980-1989                              |                   |            |
|------------------------------------------------------------------------|-------------------|------------|-----------------------------------------------------|-------------------|------------|----------------------------------------|-------------------|------------|
| Source Title                                                           | # of Publications | % of Total | Source Title                                        | # of Publications | % of Total | Source Title                           | # of Publications | % of Total |
| Journal of Psychoactive Drugs                                          | 11                | 3.65       | Federation Proceedings                              | 53                | 2.26       | Substance Use and Misuse               | 36                | 2.32       |
| Lancet                                                                 | 11                | 3.65       | Psychopharmacologia                                 | 52                | 2.21       | Journal of Psychoactive Drugs          | 34                | 2.19       |
| Tetrahedron Letters                                                    | 9                 | 2.99       | Annals of the New York Academy of Sciences          | 51                | 2.17       | Pharmacology Biochemistry and Behavior | 33                | 2.12       |
| American Journal of Psychiatry                                         | 8                 | 2.66       | Substance Use and Misuse                            | 48                | 2.04       | Psychopharmacology                     | 32                | 2.06       |
| Journal of the American Chemical Society                               | 8                 | 2.66       | American Journal of Psychiatry                      | 38                | 1.62       | NIDA Research Monograph Series         | 30                | 1.93       |
| Science                                                                | 8                 | 2.66       | Journal of Chromatography A                         | 38                | 1.62       | NIDA Research Monograph                | 28                | 1.80       |
| Archives Internationales de Pharmacodynamie et de Therapie             | 7                 | 2.33       | Advances in the Biosciences                         | 35                | 1.49       | Bulletin on Narcotics                  | 27                | 1.74       |
| Bulletin of the National Institute of Hygienic Sciences                | 7                 | 2.33       | British Journal of Addiction to Alcohol Other Drugs | 34                | 1.45       | Journal of Analytical Toxicology       | 27                | 1.74       |
| Tetrahedron                                                            | 7                 | 2.33       | Bulletin on Narcotics                               | 34                | 1.45       | Drug and Alcohol Dependence            | 26                | 1.67       |
| Fresenius Zeitschrift Fur Analytische Chemie (Tied for Top 10)         | 6                 | 1.99       | Journal of Pharmacy and Pharmacology                | 34                | 1.45       | Federation Proceedings                 | 23                | 1.48       |
| JAMA the Journal of The American Medical Association (Tied for Top 10) | 6                 | 1.99       |                                                     |                   |            |                                        |                   |            |
| Psychopharmacologia (Tied for Top 10)                                  | 6                 | 1.99       |                                                     |                   |            |                                        |                   |            |
| 1990-1999                                                              |                   |            | 2000-2009                                           |                   |            | 2010-2019                              |                   |            |
| Source Title                                                           | # of Publications | % of Total | Source Title                                        | # of Publications | % of Total | Source Title                           | # of Publications | % of Total |
| Life Sciences                                                          | 65                | 3.14       | European Journal of Pharmacology                    | 162               | 2.70       | Drug and Alcohol Dependence            | 437               | 3.17       |
| Pharmacology Biochemistry and Behavior                                 | 64                | 3.09       | British Journal of Pharmacology                     | 145               | 2.42       | Addictive Behaviors                    | 261               | 1.89       |
| Journal of Pharmacology and Experimental Therapeutics                  | 58                | 2.80       | Drug and Alcohol Dependence                         | 116               | 1.93       | Plos One                               | 185               | 1.34       |

|                                                  |    |      |                                                       |    |      |                                      |     |      |
|--------------------------------------------------|----|------|-------------------------------------------------------|----|------|--------------------------------------|-----|------|
| European Journal of Pharmacology                 | 53 | 2.56 | Addiction                                             | 95 | 1.58 | Addiction                            | 151 | 1.10 |
| Journal of Analytical Toxicology                 | 37 | 1.79 | Psychopharmacology                                    | 91 | 1.52 | British Journal of Pharmacology      | 147 | 1.07 |
| Brain Research                                   | 31 | 1.50 | Journal of Pharmacology and Experimental Therapeutics | 90 | 1.50 | International Journal of Drug Policy | 137 | 0.99 |
| British Journal of Pharmacology                  | 29 | 1.40 | Journal of Neuroscience                               | 81 | 1.35 | Psychopharmacology                   | 137 | 0.99 |
| Drug and Alcohol Dependence                      | 28 | 1.35 | Neuropharmacology                                     | 80 | 1.33 | Substance Use and Misuse             | 121 | 0.88 |
| Substance Use and Misuse                         | 28 | 1.35 | Addictive Behaviors                                   | 78 | 1.30 | Forensic Science International       | 118 | 0.86 |
| Journal of Medicinal Chemistry (Tied for Top 10) | 25 | 1.21 | Neuroscience                                          | 66 | 1.10 | Drug Testing and Analysis            | 111 | 0.81 |
| Psychopharmacology (Tied for Top 10)             | 25 | 1.21 |                                                       |    |      |                                      |     |      |

**Decade-by-Decade Breakdown by Top 10 Author Keywords (1960s-2010s)**

| 1960-1969                   |                   |            | 1970-1979                   |                   |            | 1980-1989                           |                   |            |
|-----------------------------|-------------------|------------|-----------------------------|-------------------|------------|-------------------------------------|-------------------|------------|
| Author Keyword              | # of Publications | % of Total | Author Keyword              | # of Publications | % of Total | Author Keyword                      | # of Publications | % of Total |
| Article                     | 202               | 67.11      | Cannabis                    | 1821              | 77.52      | Cannabis                            | 968               | 62.25      |
| Cannabis                    | 194               | 64.45      | Human                       | 907               | 38.61      | Human                               | 775               | 49.84      |
| Human                       | 111               | 36.88      | Article                     | 862               | 36.70      | Tetrahydrocannabinol                | 510               | 32.80      |
| Addiction                   | 69                | 22.92      | Tetrahydrocannabinol        | 813               | 34.61      | Male                                | 459               | 29.52      |
| Substance-Related Disorders | 69                | 22.92      | Male                        | 693               | 29.50      | Central Nervous System              | 413               | 26.56      |
| Adult                       | 45                | 14.95      | Theoretical Study           | 689               | 29.33      | Cannabinoids                        | 384               | 24.69      |
| Male                        | 43                | 14.29      | Animal                      | 438               | 18.65      | Female                              | 318               | 20.45      |
| Female                      | 32                | 10.63      | Adult                       | 419               | 17.84      | Nonhuman                            | 301               | 19.36      |
| Humans                      | 32                | 10.63      | Substance-Related Disorders | 410               | 17.45      | Adult                               | 298               | 19.16      |
| Drug Effect                 | 31                | 10.30      | Drug Effect                 | 332               | 14.13      | Animal Experiment (Tied for Top 10) | 297               | 19.10      |
|                             |                   |            |                             |                   |            | Cannabinoid (Tied for Top 10)       | 297               | 19.10      |
| 1990-1999                   |                   |            | 2000-2009                   |                   |            | 2010-2019                           |                   |            |
| Author Keyword              | # of Publications | % of Total | Author Keyword              | # of Publications | % of Total | Author Keyword                      | # of Publications | % of Total |
| Article                     | 1511              | 72.96      | Article                     | 4436              | 73.99      | Article                             | 8668              | 62.87      |
| Priority Journal            | 949               | 45.82      | Human                       | 3164              | 52.78      | Human                               | 8551              | 62.02      |
| Human                       | 935               | 45.15      | Priority Journal            | 2906              | 48.47      | Humans                              | 7319              | 53.08      |
| Cannabis                    | 875               | 42.25      | Controlled Study            | 2827              | 47.16      | Male                                | 6586              | 47.77      |
| Male                        | 843               | 40.70      | Male                        | 2795              | 46.62      | Cannabis                            | 5767              | 41.83      |
| Nonhuman                    | 784               | 37.86      | Cannabis                    | 2561              | 42.72      | Priority Journal                    | 5062              | 36.71      |
| Controlled Study            | 663               | 32.01      | Humans                      | 2492              | 41.57      | Female                              | 4975              | 36.08      |
| Cannabinoid                 | 595               | 28.73      | Nonhuman                    | 2460              | 41.03      | Controlled Study                    | 4918              | 35.67      |
| Cannabinoid Receptor        | 583               | 28.15      | Animals                     | 1973              | 32.91      | Adult                               | 4445              | 32.24      |
| Cannabinoids                | 532               | 25.69      | Female                      | 1696              | 28.29      | Nonhuman                            | 3675              | 26.65      |

**Decade-by-Decade Breakdown by Top 10 Institutional Affiliations (1960s-2010s)**

| 1960-1969                                                 |                   |            | 1970-1979                                                            |                   |            | 1980-1989                                                            |                   |            |
|-----------------------------------------------------------|-------------------|------------|----------------------------------------------------------------------|-------------------|------------|----------------------------------------------------------------------|-------------------|------------|
| Affiliation                                               | # of Publications | % of Total | Affiliation                                                          | # of Publications | % of Total | Affiliation                                                          | # of Publications | % of Total |
| Weizmann Institute of Science Israel                      | 9                 | 2.99       | VA Medical Center                                                    | 65                | 2.77       | Centre for Addiction and Mental Health                               | 28                | 1.80       |
| Universität Bonn                                          | 8                 | 2.66       | University of Mississippi                                            | 48                | 2.04       | University of Mississippi                                            | 26                | 1.67       |
| Faculty of Medicine                                       | 6                 | 1.99       | Medical College of Virginia                                          | 38                | 1.62       | National Institute on Drug Abuse NIDA                                | 21                | 1.35       |
| Kyushu University                                         | 5                 | 1.66       | University of California, Los Angeles                                | 35                | 1.49       | Johns Hopkins School of Medicine                                     | 19                | 1.22       |
| Hokkaido University                                       | 5                 | 1.66       | Universidade Federal de São Paulo                                    | 34                | 1.45       | Hebrew University of Jerusalem                                       | 19                | 1.22       |
| USDA Agricultural Research Service (Tied for Top 10)      | 3                 | 1.00       | Eli Lilly and Company                                                | 32                | 1.36       | David Geffen School of Medicine at UCLA                              | 18                | 1.16       |
| Hebrew University of Jerusalem (Tied for Top 10)          | 3                 | 1.00       | University of Mississippi, Research Institute Pharmaceutical Science | 28                | 1.19       | University of Mississippi, Research Institute Pharmaceutical Science | 18                | 1.16       |
| University of Toronto (Tied for Top 10)                   | 3                 | 1.00       | Harvard Medical School                                               | 25                | 1.06       | Hokuriku University                                                  | 17                | 1.09       |
| Instituto Biologico - Sao Paulo (Tied for Top 10)         | 3                 | 1.00       | University of Utah School of Medicine                                | 24                | 1.02       | Faculty of Medicine                                                  | 17                | 1.09       |
| United States Department of Agriculture (Tied for Top 10) | 3                 | 1.00       | Virginia Commonwealth University (Tied for Top 10)                   | 23                | 0.98       | University of California, Los Angeles                                | 17                | 1.09       |
| Arthur D Little, Inc. (Tied for Top 10)                   | 3                 | 1.00       | Indiana University School of Medicine (Tied for Top 10)              | 23                | 0.98       |                                                                      |                   |            |
| 1990-1999                                                 |                   |            | 2000-2009                                                            |                   |            | 2010-2019                                                            |                   |            |
| Affiliation                                               | # of Publications | % of Total | Affiliation                                                          | # of Publications | % of Total | Affiliation                                                          | # of Publications | % of Total |
| Medical College of Virginia                               | 95                | 4.59       | Universidad Complutense de Madrid                                    | 139               | 2.32       | King's College London                                                | 284               | 2.06       |
| Virginia Commonwealth University                          | 88                | 4.25       | National Institutes of Health NIH                                    | 120               | 2.00       | University of Toronto                                                | 264               | 1.91       |
| Sanofi S.A.                                               | 52                | 2.51       | University of Washington                                             | 109               | 1.82       | National Institutes of Health NIH                                    | 263               | 1.91       |
| University of Connecticut                                 | 51                | 2.46       | Virginia Commonwealth University                                     | 108               | 1.80       | Universidade de São Paulo                                            | 221               | 1.60       |

|                                          |    |      |                                       |     |      |                                       |     |      |
|------------------------------------------|----|------|---------------------------------------|-----|------|---------------------------------------|-----|------|
| Universidad Complutense de Madrid        | 48 | 2.32 | Consiglio Nazionale delle Ricerche    | 108 | 1.80 | National Institute on Drug Abuse NIDA | 207 | 1.50 |
| Hebrew University of Jerusalem           | 44 | 2.12 | University of Aberdeen                | 91  | 1.52 | UNSW Sydney                           | 189 | 1.37 |
| National Institute of Mental Health NIMH | 41 | 1.98 | National Institute on Drug Abuse NIDA | 91  | 1.52 | Harvard Medical School                | 183 | 1.33 |
| Faculty of Medicine                      | 38 | 1.83 | Inserm                                | 90  | 1.50 | Inserm                                | 177 | 1.28 |
| University of Aberdeen                   | 36 | 1.74 | King's College London                 | 73  | 1.22 | Columbia University                   | 170 | 1.23 |
| Brown University                         | 33 | 1.59 | University of Connecticut             | 71  | 1.18 | Consiglio Nazionale delle Ricerche    | 167 | 1.21 |

**Decade-by-Decade Breakdown by Top 10 Funding Sponsors (1960s-2010s)**

| 1960-1969                                                              |                   |            | 1970-1979                                                              |                   |            | 1980-1989                                                                       |                   |            |
|------------------------------------------------------------------------|-------------------|------------|------------------------------------------------------------------------|-------------------|------------|---------------------------------------------------------------------------------|-------------------|------------|
| Funding Sponsor                                                        | # of Publications | % of Total | Funding Sponsor                                                        | # of Publications | % of Total | Funding Sponsor                                                                 | # of Publications | % of Total |
| National Institutes of Health                                          | 3                 | 1.00       | U.S. Department of Health and Human Services                           | 46                | 1.96       | National Institutes of Health                                                   | 208               | 13.38      |
| U.S. Department of Health and Human Services                           | 3                 | 1.00       | National Institutes of Health                                          | 45                | 1.92       | U.S. Department of Health and Human Services                                    | 200               | 12.86      |
| U.S. Public Health Service                                             | 3                 | 1.00       | National Institute on Drug Abuse                                       | 25                | 1.06       | National Institute on Drug Abuse                                                | 167               | 10.74      |
| National Institute of Mental Health                                    | 2                 | 0.66       | U.S. Public Health Service                                             | 22                | 0.94       | National Institute of Neurological Disorders and Stroke                         | 20                | 1.29       |
| Boston University (Tied for Top 10)                                    | 1                 | 0.33       | National Institute of Mental Health                                    | 13                | 0.55       | National Eye Institute                                                          | 14                | 0.90       |
| Business Finland (Tied for Top 10)                                     | 1                 | 0.33       | Medical Research Council                                               | 4                 | 0.17       | Eunice Kennedy Shriver National Institute of Child Health and Human Development | 13                | 0.84       |
| Fundação de Amparo à Pesquisa do Estado de São Paulo (Tied for Top 10) | 1                 | 0.33       | National Eye Institute                                                 | 4                 | 0.17       | National Institute of Mental Health                                             | 11                | 0.71       |
| Medical Research Council (Tied for Top 10)                             | 1                 | 0.33       | Fundação de Amparo à Pesquisa do Estado de São Paulo (Tied for Top 10) | 3                 | 0.13       | U.S. Public Health Service                                                      | 11                | 0.71       |
| Medicinska Forskningsrådet (Tied for Top 10)                           | 1                 | 0.33       | Presbyterian Historical Society (Tied for Top 10)                      | 3                 | 0.13       | National Institute on Alcohol Abuse and Alcoholism                              | 10                | 0.64       |
| U.S. Food and Drug Administration (Tied for Top 10)                    | 1                 | 0.33       | U.S. Department of Justice (Tied for Top 10)                           | 3                 | 0.13       | National Center for Research Resources                                          | 9                 | 0.58       |
| UK Research and Innovation (Tied for Top 10)                           | 1                 | 0.33       | UK Research and Innovation (Tied for Top 10)                           | 3                 | 0.13       |                                                                                 |                   |            |
|                                                                        |                   |            | University of California, Los Angeles (Tied for Top 10)                | 3                 | 0.13       |                                                                                 |                   |            |

| 1990-1999                                               |                   |            | 2000-2009                                               |                   |            | 2010-2019                                          |                   |            |
|---------------------------------------------------------|-------------------|------------|---------------------------------------------------------|-------------------|------------|----------------------------------------------------|-------------------|------------|
| Funding Sponsor                                         | # of Publications | % of Total | Funding Sponsor                                         | # of Publications | % of Total | Funding Sponsor                                    | # of Publications | % of Total |
| National Institute on Drug Abuse                        | 505               | 24.38      | National Institute on Drug Abuse                        | 1122              | 18.72      | National Institute on Drug Abuse                   | 2249              | 16.31      |
| National Institutes of Health                           | 404               | 19.51      | National Institutes of Health                           | 812               | 13.54      | National Institutes of Health                      | 1353              | 9.81       |
| U.S. Department of Health and Human Services            | 360               | 17.38      | U.S. Department of Health and Human Services            | 610               | 10.18      | National Institute on Alcohol Abuse and Alcoholism | 683               | 4.95       |
| National Institute of Neurological Disorders and Stroke | 45                | 2.17       | National Institute on Alcohol Abuse and Alcoholism      | 182               | 3.04       | National Institute of Mental Health                | 398               | 2.89       |
| National Institute of Mental Health                     | 42                | 2.03       | National Institute of Mental Health                     | 139               | 2.32       | U.S. Department of Health and Human Services       | 354               | 2.57       |
| National Institute on Alcohol Abuse and Alcoholism      | 34                | 1.64       | National Institute of Neurological Disorders and Stroke | 91                | 1.52       | National Cancer Institute                          | 206               | 1.49       |
| National Heart, Lung, and Blood Institute               | 18                | 0.87       | National Center for Research Resources                  | 58                | 0.97       | Canadian Institutes of Health Research             | 189               | 1.37       |
| National Institute of Development Administration        | 18                | 0.87       | National Cancer Institute                               | 54                | 0.90       | Medical Research Council                           | 187               | 1.36       |
| National Center for Research Resources                  | 17                | 0.82       | Medical Research Council                                | 50                | 0.83       | European Commission                                | 183               | 1.33       |
| U.S. Public Health Service                              | 17                | 0.82       | Deutsche Forschungsgemeinschaft                         | 47                | 0.78       | National Natural Science Foundation of China       | 179               | 1.30       |

### Decade-by-Decade Breakdown by Most Productive Regions (1960s-2010s)

| 1960-1969                        |                   |            | 1970-1979      |                   |            | 1980-1989      |                   |            |
|----------------------------------|-------------------|------------|----------------|-------------------|------------|----------------|-------------------|------------|
| Region                           | # of Publications | % of Total | Country        | # of Publications | % of Total | Region         | # of Publications | % of Total |
| United States                    | 33                | 10.96      | United States  | 979               | 41.68      | United States  | 766               | 49.26      |
| Israel                           | 14                | 4.65       | Canada         | 140               | 5.96       | United Kingdom | 84                | 5.40       |
| Japan                            | 13                | 4.32       | United Kingdom | 86                | 3.66       | Canada         | 71                | 4.57       |
| Germany                          | 12                | 3.99       | India          | 69                | 2.94       | India          | 51                | 3.28       |
| United Kingdom                   | 10                | 3.32       | Netherlands    | 47                | 2.00       | Italy          | 42                | 2.70       |
| Brazil                           | 7                 | 2.33       | Germany        | 46                | 1.96       | Japan          | 42                | 2.70       |
| Canada                           | 7                 | 2.33       | Brazil         | 44                | 1.87       | Israel         | 38                | 2.44       |
| India                            | 6                 | 1.99       | Italy          | 39                | 1.66       | Sweden         | 34                | 2.19       |
| Italy                            | 3                 | 1.00       | Sweden         | 37                | 1.58       | Germany        | 32                | 2.06       |
| Australia (Tied for Top 10)      | 2                 | 0.66       | Israel         | 34                | 1.45       | Switzerland    | 28                | 1.80       |
| Austria (Tied for Top 10)        | 2                 | 0.66       |                |                   |            |                |                   |            |
| Czech Republic (Tied for Top 10) | 2                 | 0.66       |                |                   |            |                |                   |            |
| Russia (Tied for Top 10)         | 2                 | 0.66       |                |                   |            |                |                   |            |
| Yugoslavia (Tied for Top 10)     | 2                 | 0.66       |                |                   |            |                |                   |            |
| 1990-1999                        |                   |            | 2000-2009      |                   |            | 2010-2019      |                   |            |
| Region                           | # of Publications | % of Total | Region         | # of Publications | % of Total | Region         | # of Publications | % of Total |
| United States                    | 1016              | 49.06      | United States  | 2237              | 37.31      | United States  | 5818              | 42.20      |
| United Kingdom                   | 139               | 6.71       | United Kingdom | 623               | 10.39      | United Kingdom | 1068              | 7.75       |
| Italy                            | 102               | 4.93       | Germany        | 439               | 7.32       | Canada         | 1043              | 7.56       |
| Japan                            | 91                | 4.39       | Italy          | 434               | 7.24       | Germany        | 896               | 6.50       |
| France                           | 89                | 4.30       | Spain          | 377               | 6.29       | Italy          | 796               | 5.77       |
| Spain                            | 85                | 4.10       | France         | 304               | 5.07       | Australia      | 748               | 5.43       |
| Germany                          | 83                | 4.01       | Australia      | 294               | 4.90       | Spain          | 731               | 5.30       |
| Israel                           | 61                | 2.95       | Canada         | 276               | 4.60       | China          | 533               | 3.87       |
| Canada                           | 55                | 2.66       | Netherlands    | 191               | 3.19       | France         | 504               | 3.66       |
| Australia                        | 54                | 2.61       | Japan          | 190               | 3.17       | Netherlands    | 433               | 3.14       |

**Decade-by-Decade Breakdown by Top 10 Languages of Publication (1960s-2010s)**

| 1960-1969  |                   |            | 1970-1979                  |                   |            | 1980-1989                   |                   |            |
|------------|-------------------|------------|----------------------------|-------------------|------------|-----------------------------|-------------------|------------|
| Language   | # of Publications | % of Total | Language                   | # of Publications | % of Total | Language                    | # of Publications | % of Total |
| English    | 225               | 74.75      | English                    | 2085              | 88.76      | English                     | 1405              | 90.35      |
| German     | 34                | 11.30      | German                     | 72                | 3.07       | German                      | 40                | 2.57       |
| French     | 11                | 3.65       | French                     | 63                | 2.68       | French                      | 32                | 2.06       |
| Japanese   | 9                 | 2.99       | Norwegian                  | 28                | 1.19       | Italian                     | 16                | 1.03       |
| Dutch      | 6                 | 1.99       | Spanish                    | 27                | 1.15       | Spanish                     | 15                | 0.96       |
| Italian    | 3                 | 1.00       | Italian                    | 21                | 0.89       | Swedish                     | 10                | 0.64       |
| Swedish    | 3                 | 1.00       | Swedish                    | 13                | 0.55       | Japanese                    | 6                 | 0.39       |
| Danish     | 2                 | 0.66       | Dutch                      | 10                | 0.43       | Danish                      | 5                 | 0.32       |
| Portuguese | 2                 | 0.66       | Japanese                   | 9                 | 0.38       | Dutch                       | 5                 | 0.32       |
| Russian    | 2                 | 0.66       | Portuguese                 | 6                 | 0.26       | Norwegian (Tied for Top 10) | 3                 | 0.19       |
|            |                   |            |                            |                   |            | Polish (Tied for Top 10)    | 3                 | 0.19       |
|            |                   |            |                            |                   |            |                             |                   |            |
| 1990-1999  |                   |            | 2000-2009                  |                   |            | 2010-2019                   |                   |            |
| Language   | # of Publications | % of Total | Language                   | # of Publications | % of Total | Language                    | # of Publications | % of Total |
| English    | 1932              | 93.29      | English                    | 5433              | 90.63      | English                     | 13078             | 94.85      |
| German     | 48                | 2.32       | French                     | 168               | 2.80       | German                      | 242               | 1.76       |
| Spanish    | 19                | 0.92       | German                     | 132               | 2.20       | Spanish                     | 175               | 1.27       |
| French     | 18                | 0.87       | Spanish                    | 100               | 1.67       | French                      | 169               | 1.23       |
| Japanese   | 13                | 0.63       | Dutch                      | 34                | 0.57       | Chinese                     | 85                | 0.62       |
| Dutch      | 9                 | 0.43       | Chinese                    | 26                | 0.43       | Portuguese                  | 34                | 0.25       |
| Italian    | 7                 | 0.34       | Portuguese                 | 19                | 0.32       | Polish                      | 23                | 0.17       |
| Portuguese | 6                 | 0.29       | Czech                      | 15                | 0.25       | Dutch                       | 21                | 0.15       |
| Russian    | 4                 | 0.19       | Russian                    | 13                | 0.22       | Russian                     | 17                | 0.12       |
| Danish     | 3                 | 0.14       | Italian (Tied for Top 10)  | 12                | 0.20       | Italian                     | 15                | 0.11       |
|            |                   |            | Japanese (Tied for Top 10) | 12                | 0.20       |                             |                   |            |
|            |                   |            | Polish (Tied for Top 10)   | 12                | 0.20       |                             |                   |            |
